# Supplementary material
Source: HighWire-hosted journal article supplement (https://qdcxjkg.com/highwire/filestream/114334/field_highwire_adjunct_files/1/Online_supplementary_Table_3_CPET_Apr_2013.pdf)
Supplement: Online_supplementary_Table_3_CPET_Apr_2013.pdf [file Online_supplementary_Table_3_CPET_Apr_2013.pdf]

| <b>Method/ parameter</b>                     | <b>N</b> | <b>(Mean±SD)</b> |
|----------------------------------------------|----------|------------------|
| VO <sub>2</sub> peak (% pred)                | 9        | 65 ± 25          |
| Maximum work rate (Watt)                     | 9        | 67 ± 40          |
| BP systolic rest (mmHg)                      | 9        | 129 ± 17         |
| BP diastolic rest (mmHg)                     | 9        | 85 ± 15          |
| BP systolic maximum exercise (mmHg)          | 9        | 155 ± 34         |
| BP diastolic maximum exercise (mmHg)         | 9        | 93 ± 22          |
| O <sub>2</sub> - pulse (ml)                  | 9        | 10 ± 4           |
| O <sub>2</sub> - pulse (% pred)              | 9        | 78 ± 24          |
| Breathing Reserve (%)                        | 9        | 31 ± 26          |
| Heart rate reserve (1/min)                   | 9        | 33 ± 19          |
| VE/VCO <sub>2</sub> slope                    | 9        | 26 ± 6           |
| RER maximum exercise                         | 9        | 0.97± 0.12       |
| P(A-a)O <sub>2</sub> peak exercise (mmHg)    | 9        | 67 ± 37          |
| PET CO <sub>2</sub> rest                     | 9        | 40 ± 4           |
| PET CO <sub>2</sub> unloaded pedaling (mmHg) | 8        | 42 ± 2           |
| PET CO <sub>2</sub> AT(mmHg)                 | 7        | 45 ± 8           |
| PET CO <sub>2</sub> max(mmHg)                | 9        | 47 ± 9           |

Online supplementary Table 3: Data of cardiopulmonary exercise test at baseline.

Values are presented as mean ± SD. VO<sub>2</sub> peak: Peak oxygen uptake. BP: Blood pressure. VE: Breathing volume per one minute. VCO<sub>2</sub>: Carbon dioxide output. RER: Respiratory exchange rate. P(A-a)O<sub>2</sub> : Alveolo-arterial O<sub>2</sub> partial pressure gradient. PET CO<sub>2</sub>: Partial pressure of endtidal CO<sub>2</sub>.
